# Supplementary material for: Extracellular protonation modulates cell-cell interaction mechanics and tissue invasion in human melanoma cells
Source: PubMed Central journal article supplement (PMC5304230; doi:10.1038/srep42369), 2017-02-13
Supplement: srep42369-s1.pdf [file srep42369-s1.pdf]

## SUPPLEMENTARY INFORMATION

### **Extracellular protonation modulates cell-cell interaction mechanics and tissue invasion in human melanoma cells**

Verena Hofschröer<sup>1\*</sup>, Alexander Koch<sup>1</sup>, Florian Timo Ludwig<sup>1</sup>, Peter Friedl<sup>2,3,4</sup>, Hans Oberleithner<sup>1</sup>, Christian Stock<sup>5#</sup> and Albrecht Schwab<sup>1#</sup>

<sup>1</sup>Institute of Physiology II, University of Münster, Münster, Germany

<sup>2</sup>Radboud University Medical Centre, Radboud Institute for Molecular Life Sciences, Department of Cell Biology, Nijmegen, The Netherlands

<sup>3</sup>David H. Koch Center for Applied Research of Genitourinary Cancers, The University of Texas MD Anderson Cancer Center, Houston, Texas, United States

<sup>4</sup>Cancer Genomics Center, CG Utrecht, The Netherlands

<sup>5</sup>Department of Gastroenterology, Hannover Medical School, Hannover, Germany

<sup>#</sup>authors contributed equally

Figure S1

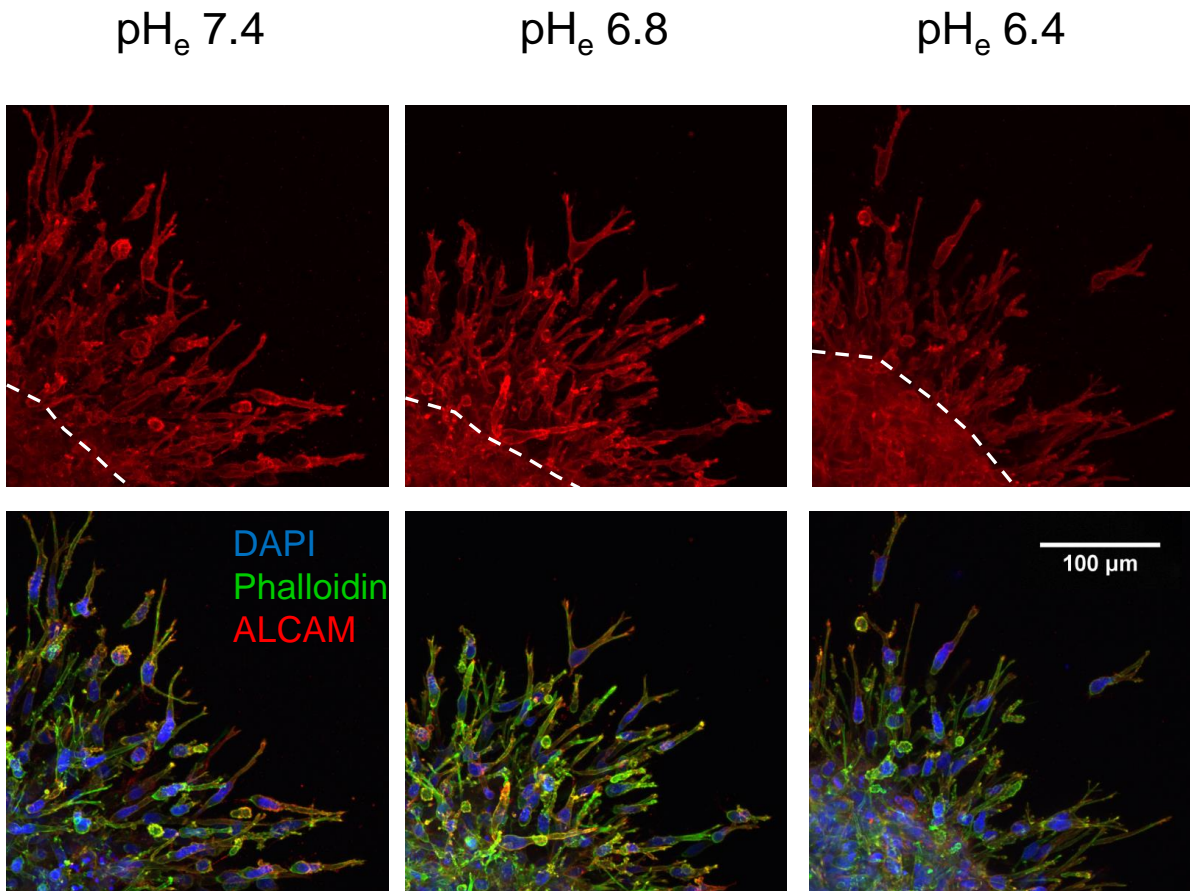

**Figure S1:** Close-ups of MV3 migration in 3D through a collagen I meshwork at varying pH<sub>e</sub>. The dashed line indicates the interphase between spheroid core and invasion zone. Images were obtained with an Olympus FV1000 scanner confocal microscope equipped with a 40x/0.8NA water immersion objective.

Figure S2

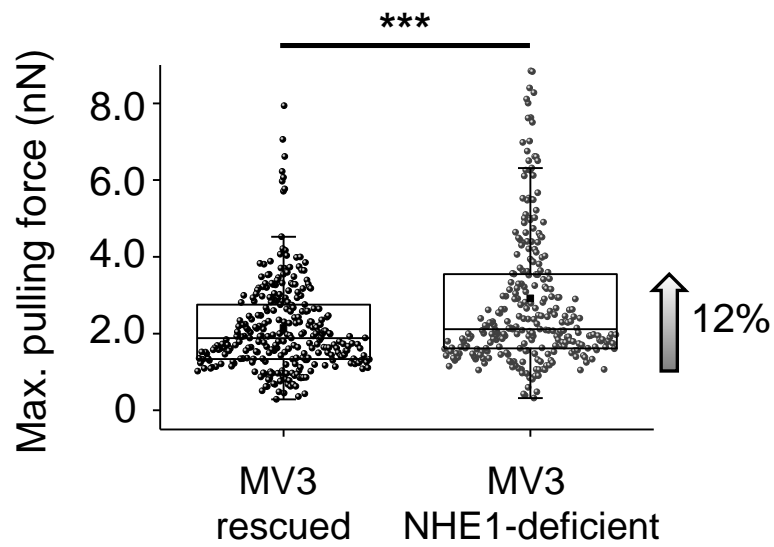

**Figure S2:** Single cell force spectroscopy using MV3 cells with different NHE1 expression levels. NHE1-deficient MV3 cells showed a significant 12% increase in the maximum pulling force compared to the respective control (NHE1-deficient: 2.11 nN (1.61/3.55 nN, N = 3, n = 286); rescued: 1.88 nN (1.34/2.76 nN, N = 3, n = 299)).

Figure S3

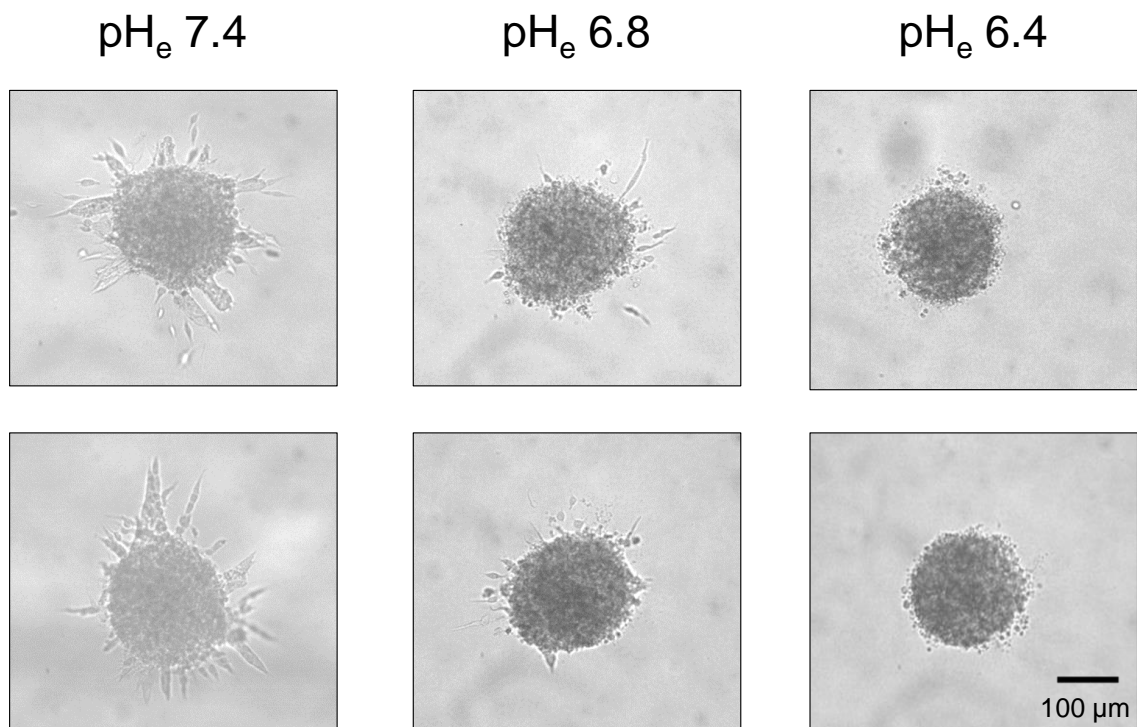

**Figure S3:** 3D migration of breast cancer cells (4T1; 1.000 cells / spheroid for 24h) through a collagen I (4 mg/ml) meshwork. Increasing the extracellular proton concentration reduces the formation of solid strands and leads to single cell migration.
